# Supplementary material for: The Prevalence of Onchocerciasis-Associated Epilepsy in Mundri West and East Counties, South Sudan: A Door-to-Door Survey
Source: MDPI journal article supplement (doi:10.3390/pathogens11040396), 2022-03-24
Supplement: s1 [file s1]

## HOUSEHOLD SURVEY QUESTIONNAIRE: SCREENING FOR EPILEPSY

Investigator's Name: \_\_\_\_\_ Signature: \_\_\_\_\_

Village: \_\_\_\_\_ Date current visit (DD/MM/YYYY): \_\_\_\_/\_\_\_\_/\_\_\_\_

Previous HOUSEHOLD CODE \_\_\_\_/\_\_\_\_/\_\_\_\_ Date previous visit \_\_\_\_/\_\_\_\_/\_\_\_\_ GPS \_\_\_\_\_

1) Name of Household head (\*): \_\_\_\_\_ Tel: \_\_\_\_\_ Ethnicity \_\_\_\_\_

2) Does family originate from this village?: ☐ YES ☐ NO If NO, How long have they been residing in this village? \_\_\_\_\_ (years)

3) Main income generating activity of the family: several answers possible  
 Farming cattle pigs fishing shop employe other, specify \_\_\_\_\_

4) Has anybody died in the household since last survey?

If YES, Name : \_\_\_\_\_ age \_\_\_\_\_ sex \_\_\_\_\_ When \_\_\_\_\_ month \_\_\_\_\_ year Cause? Epilepsy/nodding Other

If YES, Name : \_\_\_\_\_ age \_\_\_\_\_ sex \_\_\_\_\_ When \_\_\_\_\_ month \_\_\_\_\_ year Cause? Epilepsy/nodding Other

If YES, Name : \_\_\_\_\_ age \_\_\_\_\_ sex \_\_\_\_\_ When \_\_\_\_\_ month \_\_\_\_\_ year Cause? Epilepsy/nodding Other

If YES, Name : \_\_\_\_\_ age \_\_\_\_\_ sex \_\_\_\_\_ When \_\_\_\_\_ month \_\_\_\_\_ year Cause? Epilepsy/nodding Other

4) Has anybody developed epilepsy/nodding in the household since last survey?

If YES, Name : \_\_\_\_\_ age \_\_\_\_\_ sex \_\_\_\_\_ When \_\_\_\_\_ month \_\_\_\_\_ year

If YES, Name : \_\_\_\_\_ age \_\_\_\_\_ sex \_\_\_\_\_ When \_\_\_\_\_ month \_\_\_\_\_ year

If YES, Name : \_\_\_\_\_ age \_\_\_\_\_ sex \_\_\_\_\_ When \_\_\_\_\_ month \_\_\_\_\_ year

If YES, Name : \_\_\_\_\_ age \_\_\_\_\_ sex \_\_\_\_\_ When \_\_\_\_\_ month \_\_\_\_\_ year

(\*) Household definition: *All occupants of the same home with or without parental ties who take meals together*

**EPILEPSY SCREENING:** If at least one response for 4.1 - 4.5 is YES, refer the participant to a neurologist. [YES: Yes; NO: No; ? : Unknown]

| 1. No. pers. |                          | 2. Age                   | 3. Gender                  |                            | 4.1 QUESTION 1                                                         |                             |                            | 4.2 QUESTION 2                                                                                     |                             |                            | 4.3 QUESTION 3                                                                                                                      |                             |                            | 4.4 QUESTION 4               |                             |                            | 4.5 QUESTION 5                                                                              |                             |                            |
|--------------|--------------------------|--------------------------|----------------------------|----------------------------|------------------------------------------------------------------------|-----------------------------|----------------------------|----------------------------------------------------------------------------------------------------|-----------------------------|----------------------------|-------------------------------------------------------------------------------------------------------------------------------------|-----------------------------|----------------------------|------------------------------|-----------------------------|----------------------------|---------------------------------------------------------------------------------------------|-----------------------------|----------------------------|
| Pst          | Abs                      | Year: Y<br>Month: M      | M=Male<br>F=Female         |                            | Loss of consciousness<br>with either urine on<br>self and/or drooling? |                             |                            | Absence(s) or loss of<br>contact with the<br>surrounding of sudden<br>onset and brief<br>duration? |                             |                            | Jerking or uncontrolled<br>abnormal movement<br>(convulsion) of the<br>limb(s) of sudden onset<br>and lasting for a few<br>minutes? |                             |                            | Head nodding?                |                             |                            | Has it ever been said that he/she is epileptic or has he already had 2 or<br>more seizures? |                             |                            |
| 1            | <input type="checkbox"/> | <input type="checkbox"/> | M <input type="checkbox"/> | F <input type="checkbox"/> | YES <input type="checkbox"/>                                           | NO <input type="checkbox"/> | ? <input type="checkbox"/> | YES <input type="checkbox"/>                                                                       | NO <input type="checkbox"/> | ? <input type="checkbox"/> | YES <input type="checkbox"/>                                                                                                        | NO <input type="checkbox"/> | ? <input type="checkbox"/> | YES <input type="checkbox"/> | NO <input type="checkbox"/> | ? <input type="checkbox"/> | YES <input type="checkbox"/>                                                                | NO <input type="checkbox"/> | ? <input type="checkbox"/> |
| 2            | <input type="checkbox"/> | <input type="checkbox"/> | M <input type="checkbox"/> | F <input type="checkbox"/> | YES <input type="checkbox"/>                                           | NO <input type="checkbox"/> | ? <input type="checkbox"/> | YES <input type="checkbox"/>                                                                       | NO <input type="checkbox"/> | ? <input type="checkbox"/> | YES <input type="checkbox"/>                                                                                                        | NO <input type="checkbox"/> | ? <input type="checkbox"/> | YES <input type="checkbox"/> | NO <input type="checkbox"/> | ? <input type="checkbox"/> | YES <input type="checkbox"/>                                                                | NO <input type="checkbox"/> | ? <input type="checkbox"/> |
| 3            | <input type="checkbox"/> | <input type="checkbox"/> | M <input type="checkbox"/> | F <input type="checkbox"/> | YES <input type="checkbox"/>                                           | NO <input type="checkbox"/> | ? <input type="checkbox"/> | YES <input type="checkbox"/>                                                                       | NO <input type="checkbox"/> | ? <input type="checkbox"/> | YES <input type="checkbox"/>                                                                                                        | NO <input type="checkbox"/> | ? <input type="checkbox"/> | YES <input type="checkbox"/> | NO <input type="checkbox"/> | ? <input type="checkbox"/> | YES <input type="checkbox"/>                                                                | NO <input type="checkbox"/> | ? <input type="checkbox"/> |
| 4            | <input type="checkbox"/> | <input type="checkbox"/> | M <input type="checkbox"/> | F <input type="checkbox"/> | YES <input type="checkbox"/>                                           | NO <input type="checkbox"/> | ? <input type="checkbox"/> | YES <input type="checkbox"/>                                                                       | NO <input type="checkbox"/> | ? <input type="checkbox"/> | YES <input type="checkbox"/>                                                                                                        | NO <input type="checkbox"/> | ? <input type="checkbox"/> | YES <input type="checkbox"/> | NO <input type="checkbox"/> | ? <input type="checkbox"/> | YES <input type="checkbox"/>                                                                | NO <input type="checkbox"/> | ? <input type="checkbox"/> |
| 5            | <input type="checkbox"/> | <input type="checkbox"/> | M <input type="checkbox"/> | F <input type="checkbox"/> | YES <input type="checkbox"/>                                           | NO <input type="checkbox"/> | ? <input type="checkbox"/> | YES <input type="checkbox"/>                                                                       | NO <input type="checkbox"/> | ? <input type="checkbox"/> | YES <input type="checkbox"/>                                                                                                        | NO <input type="checkbox"/> | ? <input type="checkbox"/> | YES <input type="checkbox"/> | NO <input type="checkbox"/> | ? <input type="checkbox"/> | YES <input type="checkbox"/>                                                                | NO <input type="checkbox"/> | ? <input type="checkbox"/> |
| 6            | <input type="checkbox"/> | <input type="checkbox"/> | M <input type="checkbox"/> | F <input type="checkbox"/> | YES <input type="checkbox"/>                                           | NO <input type="checkbox"/> | ? <input type="checkbox"/> | YES <input type="checkbox"/>                                                                       | NO <input type="checkbox"/> | ? <input type="checkbox"/> | YES <input type="checkbox"/>                                                                                                        | NO <input type="checkbox"/> | ? <input type="checkbox"/> | YES <input type="checkbox"/> | NO <input type="checkbox"/> | ? <input type="checkbox"/> | YES <input type="checkbox"/>                                                                | NO <input type="checkbox"/> | ? <input type="checkbox"/> |
| 7            | <input type="checkbox"/> | <input type="checkbox"/> | M <input type="checkbox"/> | F <input type="checkbox"/> | YES <input type="checkbox"/>                                           | NO <input type="checkbox"/> | ? <input type="checkbox"/> | YES <input type="checkbox"/>                                                                       | NO <input type="checkbox"/> | ? <input type="checkbox"/> | YES <input type="checkbox"/>                                                                                                        | NO <input type="checkbox"/> | ? <input type="checkbox"/> | YES <input type="checkbox"/> | NO <input type="checkbox"/> | ? <input type="checkbox"/> | YES <input type="checkbox"/>                                                                | NO <input type="checkbox"/> | ? <input type="checkbox"/> |
| 8            | <input type="checkbox"/> | <input type="checkbox"/> | M <input type="checkbox"/> | F <input type="checkbox"/> | YES <input type="checkbox"/>                                           | NO <input type="checkbox"/> | ? <input type="checkbox"/> | YES <input type="checkbox"/>                                                                       | NO <input type="checkbox"/> | ? <input type="checkbox"/> | YES <input type="checkbox"/>                                                                                                        | NO <input type="checkbox"/> | ? <input type="checkbox"/> | YES <input type="checkbox"/> | NO <input type="checkbox"/> | ? <input type="checkbox"/> | YES <input type="checkbox"/>                                                                | NO <input type="checkbox"/> | ? <input type="checkbox"/> |
| 9            | <input type="checkbox"/> | <input type="checkbox"/> | M <input type="checkbox"/> | F <input type="checkbox"/> | YES <input type="checkbox"/>                                           | NO <input type="checkbox"/> | ? <input type="checkbox"/> | YES <input type="checkbox"/>                                                                       | NO <input type="checkbox"/> | ? <input type="checkbox"/> | YES <input type="checkbox"/>                                                                                                        | NO <input type="checkbox"/> | ? <input type="checkbox"/> | YES <input type="checkbox"/> | NO <input type="checkbox"/> | ? <input type="checkbox"/> | YES <input type="checkbox"/>                                                                | NO <input type="checkbox"/> | ? <input type="checkbox"/> |
| 10           | <input type="checkbox"/> | <input type="checkbox"/> | M <input type="checkbox"/> | F <input type="checkbox"/> | YES <input type="checkbox"/>                                           | NO <input type="checkbox"/> | ? <input type="checkbox"/> | YES <input type="checkbox"/>                                                                       | NO <input type="checkbox"/> | ? <input type="checkbox"/> | YES <input type="checkbox"/>                                                                                                        | NO <input type="checkbox"/> | ? <input type="checkbox"/> | YES <input type="checkbox"/> | NO <input type="checkbox"/> | ? <input type="checkbox"/> | YES <input type="checkbox"/>                                                                | NO <input type="checkbox"/> | ? <input type="checkbox"/> |
| 11           | <input type="checkbox"/> | <input type="checkbox"/> | M <input type="checkbox"/> | F <input type="checkbox"/> | YES <input type="checkbox"/>                                           | NO <input type="checkbox"/> | ? <input type="checkbox"/> | YES <input type="checkbox"/>                                                                       | NO <input type="checkbox"/> | ? <input type="checkbox"/> | YES <input type="checkbox"/>                                                                                                        | NO <input type="checkbox"/> | ? <input type="checkbox"/> | YES <input type="checkbox"/> | NO <input type="checkbox"/> | ? <input type="checkbox"/> | YES <input type="checkbox"/>                                                                | NO <input type="checkbox"/> | ? <input type="checkbox"/> |
| 12           | <input type="checkbox"/> | <input type="checkbox"/> | M <input type="checkbox"/> | F <input type="checkbox"/> | YES <input type="checkbox"/>                                           | NO <input type="checkbox"/> | ? <input type="checkbox"/> | YES <input type="checkbox"/>                                                                       | NO <input type="checkbox"/> | ? <input type="checkbox"/> | YES <input type="checkbox"/>                                                                                                        | NO <input type="checkbox"/> | ? <input type="checkbox"/> | YES <input type="checkbox"/> | NO <input type="checkbox"/> | ? <input type="checkbox"/> | YES <input type="checkbox"/>                                                                | NO <input type="checkbox"/> | ? <input type="checkbox"/> |
| 13           | <input type="checkbox"/> | <input type="checkbox"/> | M <input type="checkbox"/> | F <input type="checkbox"/> | YES <input type="checkbox"/>                                           | NO <input type="checkbox"/> | ? <input type="checkbox"/> | YES <input type="checkbox"/>                                                                       | NO <input type="checkbox"/> | ? <input type="checkbox"/> | YES <input type="checkbox"/>                                                                                                        | NO <input type="checkbox"/> | ? <input type="checkbox"/> | YES <input type="checkbox"/> | NO <input type="checkbox"/> | ? <input type="checkbox"/> | YES <input type="checkbox"/>                                                                | NO <input type="checkbox"/> | ? <input type="checkbox"/> |
| 14           | <input type="checkbox"/> | <input type="checkbox"/> | M <input type="checkbox"/> | F <input type="checkbox"/> | YES <input type="checkbox"/>                                           | NO <input type="checkbox"/> | ? <input type="checkbox"/> | YES <input type="checkbox"/>                                                                       | NO <input type="checkbox"/> | ? <input type="checkbox"/> | YES <input type="checkbox"/>                                                                                                        | NO <input type="checkbox"/> | ? <input type="checkbox"/> | YES <input type="checkbox"/> | NO <input type="checkbox"/> | ? <input type="checkbox"/> | YES <input type="checkbox"/>                                                                | NO <input type="checkbox"/> | ? <input type="checkbox"/> |
| 15           | <input type="checkbox"/> | <input type="checkbox"/> | M <input type="checkbox"/> | F <input type="checkbox"/> | YES <input type="checkbox"/>                                           | NO <input type="checkbox"/> | ? <input type="checkbox"/> | YES <input type="checkbox"/>                                                                       | NO <input type="checkbox"/> | ? <input type="checkbox"/> | YES <input type="checkbox"/>                                                                                                        | NO <input type="checkbox"/> | ? <input type="checkbox"/> | YES <input type="checkbox"/> | NO <input type="checkbox"/> | ? <input type="checkbox"/> | YES <input type="checkbox"/>                                                                | NO <input type="checkbox"/> | ? <input type="checkbox"/> |
| 16           | <input type="checkbox"/> | <input type="checkbox"/> | M <input type="checkbox"/> | F <input type="checkbox"/> | YES <input type="checkbox"/>                                           | NO <input type="checkbox"/> | ? <input type="checkbox"/> | YES <input type="checkbox"/>                                                                       | NO <input type="checkbox"/> | ? <input type="checkbox"/> | YES <input type="checkbox"/>                                                                                                        | NO <input type="checkbox"/> | ? <input type="checkbox"/> | YES <input type="checkbox"/> | NO <input type="checkbox"/> | ? <input type="checkbox"/> | YES <input type="checkbox"/>                                                                | NO <input type="checkbox"/> | ? <input type="checkbox"/> |
| 17           | <input type="checkbox"/> | <input type="checkbox"/> | M <input type="checkbox"/> | F <input type="checkbox"/> | YES <input type="checkbox"/>                                           | NO <input type="checkbox"/> | ? <input type="checkbox"/> | YES <input type="checkbox"/>                                                                       | NO <input type="checkbox"/> | ? <input type="checkbox"/> | YES <input type="checkbox"/>                                                                                                        | NO <input type="checkbox"/> | ? <input type="checkbox"/> | YES <input type="checkbox"/> | NO <input type="checkbox"/> | ? <input type="checkbox"/> | YES <input type="checkbox"/>                                                                | NO <input type="checkbox"/> | ? <input type="checkbox"/> |
| 18           | <input type="checkbox"/> | <input type="checkbox"/> | M <input type="checkbox"/> | F <input type="checkbox"/> | YES <input type="checkbox"/>                                           | NO <input type="checkbox"/> | ? <input type="checkbox"/> | YES <input type="checkbox"/>                                                                       | NO <input type="checkbox"/> | ? <input type="checkbox"/> | YES <input type="checkbox"/>                                                                                                        | NO <input type="checkbox"/> | ? <input type="checkbox"/> | YES <input type="checkbox"/> | NO <input type="checkbox"/> | ? <input type="checkbox"/> | YES <input type="checkbox"/>                                                                | NO <input type="checkbox"/> | ? <input type="checkbox"/> |
| 19           | <input type="checkbox"/> | <input type="checkbox"/> | M <input type="checkbox"/> | F <input type="checkbox"/> | YES <input type="checkbox"/>                                           | NO <input type="checkbox"/> | ? <input type="checkbox"/> | YES <input type="checkbox"/>                                                                       | NO <input type="checkbox"/> | ? <input type="checkbox"/> | YES <input type="checkbox"/>                                                                                                        | NO <input type="checkbox"/> | ? <input type="checkbox"/> | YES <input type="checkbox"/> | NO <input type="checkbox"/> | ? <input type="checkbox"/> | YES <input type="checkbox"/>                                                                | NO <input type="checkbox"/> | ? <input type="checkbox"/> |
| 20           | <input type="checkbox"/> | <input type="checkbox"/> | M <input type="checkbox"/> | F <input type="checkbox"/> | YES <input type="checkbox"/>                                           | NO <input type="checkbox"/> | ? <input type="checkbox"/> | YES <input type="checkbox"/>                                                                       | NO <input type="checkbox"/> | ? <input type="checkbox"/> | YES <input type="checkbox"/>                                                                                                        | NO <input type="checkbox"/> | ? <input type="checkbox"/> | YES <input type="checkbox"/> | NO <input type="checkbox"/> | ? <input type="checkbox"/> | YES <input type="checkbox"/>                                                                | NO <input type="checkbox"/> | ? <input type="checkbox"/> |

**PERSONS SUSPECTED TO HAVE EPILEPSY (REFER TO DOCTOR / NEUROLOGIST) :**

CODE (I/VV/HHH/N°):    \_\_\_/\_\_\_/\_\_\_/\_\_\_    Name: \_\_\_\_\_

Sex (M/F): \_\_\_\_\_    Age: \_\_\_\_\_
